# Supplementary material
Source: PubMed Central journal article supplement (PMC1463026)
Supplement: pbio.0040180.sg001.pdf [file pbio.0040180.sg001.pdf]

**A**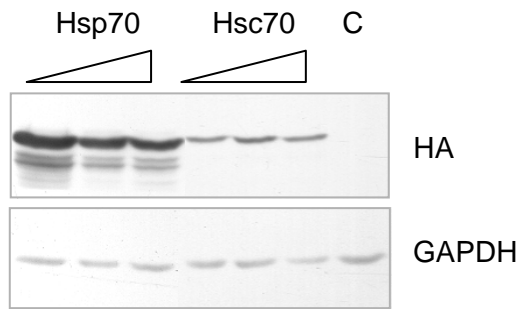**B**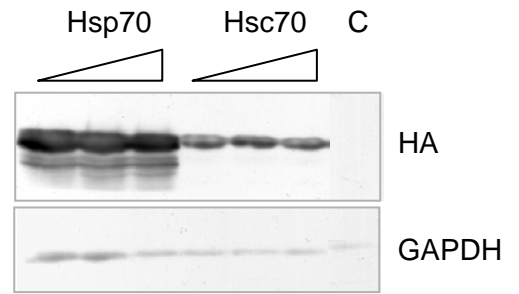**C**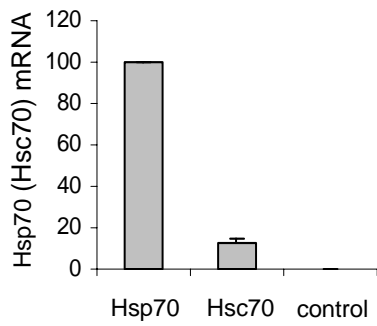**D**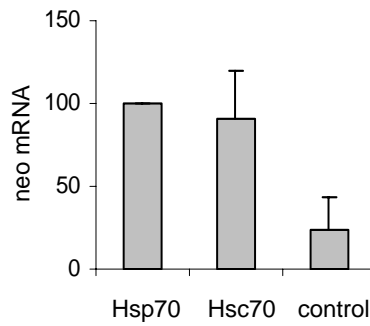**E**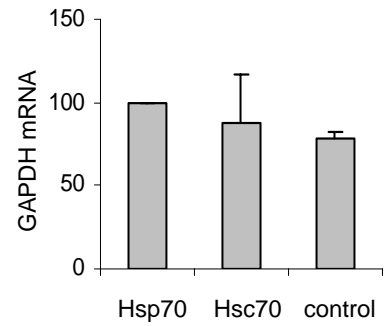

Figure S1
